# Supplementary material for: Biopsy-based normalizations of gill monogenean-infected European catfish (Silurus glanis L., 1758) stocks for laboratory-based experiments
Source: PeerJ. 2024 Nov 14;12:e18288. doi: 10.7717/peerj.18288 (PMC11569781; doi:10.7717/peerj.18288)
Supplement: Supplemental Information 1 — Supplementary Table 1A. Teleost fish species listed in order of occurence in the manuscript ’Biopsy-based normalization of gill monogenean-infected European catfish (Silurus glanis L., 1758) stocks for laboratory-based experiments’. Supplementary Table 1B. Monogenean species listed in order of occurence in the manuscript ’Biopsy-based normalization of gill monogenean-infected European catfish (Silurus glanis L., 1758) stocks for laboratory-based experiments’. [file peerj-12-18288-s001.xlsx]

## Sheet: Teleost Fish
Supplementary Table 1a. Teleost fish species listed in order of occurence in the manuscript 'Biopsy-based normalization of gill monogenean-infected European catfish (Silurus glanis L., 1758) stocks for laboratory-based experiments'
Common Name	Scientific Name	Author	Date	Taxonomic citation	National Center for Biotechnology Information Taxonomy ID
Wels catfish/European catfish	Silurus glanis	Carl Linnaeus	1758	Silurus glanis Linnaeus, 1758	NCBI:txid94993
yellowtail kingfish/yellowtail amberjack	Seriola lalandi	Achille Valenciennes	1833	Seriola lalandi Valenciennes, 1833	NCBI:txid302047
silver perch	Bidyanus bidyanus	Major Thomas Mitchell	1832	Bidyanus bidyanus Mitchell, 1832	NCBI:txid443752
West Australian dhufish/Westralian jewfish	Glaucosoma hebraicum	John Richardson	1845	Glaucosoma hebraicum Richardson, 1845	NCBI:txid443782
greater amberjack	Seriola dumerili	Giuseppe Antonio Risso	1810	Seriola dumerili Risso, 1810	NCBI:txid41447
black bream/yellowfin bream	Acanthopagrus australis	Albert Günther	1859	Acanthopagrus australis Günther, 1859	NCBI:txid160963
dusky farmerfish	Stegastes nigricans	Bernard-Germain-Étienne Lacépède	1802	Stegastes nigricans Lacépède, 1802	NCBI:txid351694
whitetail dascyllus	Dascyllus aruanus	Carl Linnaeus	1758	Dascyllus aruanus Linnaeus, 1758	NCBI:txid80949
*source of data
Froese, R. and D. Pauly. Editors. 2024. FishBase. World Wide Web electronic publication. www.fishbase.org, version (02/2024).
Schoch CL, et al. NCBI Taxonomy: a comprehensive update on curation, resources and tools. Database (Oxford). 2020: baaa062. PubMed: 32761142 PMC: PMC7408187.

## Sheet: Monogenean parasite
Supplementary Table 1b. Monogenean species listed in order of occurence in the manuscript 'Biopsy-based normalization of gill monogenean-infected European catfish (Silurus glanis L., 1758) stocks for laboratory-based experiments'
Scientific Name	Author	Date	Taxonomic citation	National Center for Biotechnology Information Taxonomy ID
Thaparocleidus vistulensis	Sivak	1932	Thaparocleidus vistulensis (Sivak, 1932) Lim, 1996	NCBI:txid198453
Thaparocleidus siluri	Zandt	1924	Thaparocleidus siluri (Zandt, 1924) Lim, 1996	NCBI:txid198452
Thaparocleidus magnus	Bychowsky & Nagibina	1957	Thaparocleidus magnus (Bychowsky & Nagibina, 1957) Lim, 1996	not available
Lepidotrema bidyana	Murray	1931	Lepidotrema bidyana Murray, 1931	not available
Haliotrema abaddon	Delane C. Kritsky & Frances Stephens	2001	Haliotrema abaddon Kritsky & Stephens, 2001	not available
Dactylogyrus amphibothrium	Wagener	1857	Dactylogyrus amphibothrium Wagener, 1857	NCBI:txid231281
Microcotyle mugilis	Vogt	1878	Microcotyle mugilis Vogt, 1878	NCBI:txid92222
Gyrodactylus salaris	Malmberg	1957	Gyrodactylus salaris Malmberg, 1957	NCBI:txid37629
Metamicrocotyla cephalus	Azim	1939	Metamicrocotyla cephalus (Azim, 1939) Hargis, 1954	NCBI:txid92242
Lamellodiscus major	Murray	1931	Lamellodiscus major Murray, 1931	not available
Polylabroides multispinosus	Frank R. Roubal	1981	Polylabroides multispinosus Roubal, 1981	not available
Lernanthropus atrox	Camill Heller	1865	Lernanthropus atrox Heller, 1865	not available
Clavellopsis parasargi	Frank R. Roubal	1981	Clavellopsis parasargi Roubal, 1981	not available
Zeuxapta seriolae	Meserve	1938	Zeuxapta seriolae (Meserve, 1938) Price, 1962	NCBI:txid82873
*source of data
WoRMS Editorial Board (2024). World Register of Marine Species. Available from https://www.marinespecies.org at VLIZ. Accessed 2024-03-14. doi:10.14284/170
Schoch CL, et al. NCBI Taxonomy: a comprehensive update on curation, resources and tools. Database (Oxford). 2020: baaa062. PubMed: 32761142 PMC: PMC7408187.
