# Supplementary material for: Biopsy-based normalizations of gill monogenean-infected European catfish (Silurus glanis L., 1758) stocks for laboratory-based experiments
Source: PeerJ. 2024 Nov 14;12:e18288. doi: 10.7717/peerj.18288 (PMC11569781; doi:10.7717/peerj.18288)
Supplement: Supplemental Information 2 [file peerj-12-18288-s002.xlsx]

## Sheet: EL1 & EL2 Parasite counts
Raw data of Thaparocleidus vistulensis (Siwak, 1932) counts
András Bognár1, Hafiz M. Borkhanuddin2,3, Shion Nagase1,4 and Boglárka Sellyei2
1 Frontline Fish Genomics Research Group, Department of Applied Fish Biology, Institute of Aquaculture and Environmental Safety, Hungarian University of Agriculture and Life Sciences, Georgikon Campus, Keszthely, Hungary; 2 HUN-REN Veterinary Medical Research Institute, Budapest, Hungary; 3 Faculty of Science and Marine Environment, Universiti Malaysia Terengganu, Kuala Nerus, Terengganu, Malaysi…
	Location		Figure 3.a	Figure 3.b	Figure 4.	Figure 5b.	Biopsy	Left side lamallae				Total Left	Right side lamallae				Total Right	Total parasites	Figure 5C
								1.	2.	3.	4.		1.	2.	3.	4.			Paired experimental groups
	Figure 2 - EL1					Biopsy-based batch B1.	1	1	2	0	0	3	1	2	3	4	10	13	Biopsy	Parasite count	Biopsy	Parasite count
							1	9	9	3	1	22	9	3	2	1	15	37		C1		C2
							5	32	53	32	28	145	14	14	23	28	79	224	31	860	37	846
							2	36	29	21	13	99	43	40	21	16	120	219	19	860	22	1032
							1	7	6	3	5	21	10	10	6	6	32	53	15	550	18	210
						Biopsy-based batch B2.	18	21	20	26	38	105						210	11	3232	11	300
							11	426	358	404	428	1616						3232	5	602	7	464
							19	137	100	92	101	430						860	4	503	5	224
							22	179	81	98	158	516						1032	2	364	4	357
							37	137	67	91	128	423						846	2	28	2	64
							51	224	95	130	155	604						1208	2	546	2	606
							31	100	94	131	105	430						860	1	193	2	219
						Biopsy-based Batch B3.	2											546	1	53	1	94
							5											602	1	13	1	37
							7											464
							11											300
							2											364
							15											550
						Biopsy-based Batch B4.	2	8	6	1	0	15	4	2	5	2	13	28
							1	3	66	7	4	80	4	4	4	2	14	94
							2	8	10	3	6	27	16	9	5	7	37	64
							4	63	37	25	50	175	84	36	31	31	182	357
							4	90	46	36	44	216	112	53	35	87	287	503
							2	137	62	58	76	333	101	62	42	68	273	606
							1	33	24	9	23	89	35	32	19	18	104	193
	Figure 2 - EL2	Random inclsuion batch A1.																28	Figure 5A
																		36
																		58
																		140
																		246
		Random inclusion batch A2.																300
																		250
																		6
																		6
																		30
																		105
																		300
																		250
		Random inclusion batch A3.																60
																		15
																		6
																		5
																		8
																		5
																		30
																		5
		Random inclusion batch A4.																39
																		91
																		14
																		29
